# Supplementary material for: Micro Finite Element models of the vertebral body: Validation of local displacement predictions
Source: PubMed Central journal article supplement (PMC5507408; doi:10.1371/journal.pone.0180151), 2017-07-11
Supplement: pone.0180151.s001.pdf [file pone.0180151.s001.pdf]

**S1 Table. Statistical analysis for the linear regressions between experimentally measured displacements and those predicted by microFE models generated with the back-calculated elastic tissue modulus  $E_t=4.6\text{GPa}$ . Data is reported for predictions along the three Cartesian directions (X and Y in a transverse plane, Z in the axial direction) for all the specimens separately and for pooled data.**

| <b>Specimen ID</b> | <b>Direction</b> | <b>Nr. Comparison points (%)</b> | <b>Slope</b> | <b>Intercept [<math>\mu\text{m}</math>]</b> | <b><math>R^2</math></b> | <b>RMSE [<math>\mu\text{m}</math>]</b> | <b>RMSE%</b> | <b>MaxError [<math>\mu\text{m}</math>]</b> | <b>CC<sup>1</sup></b> |
|--------------------|------------------|----------------------------------|--------------|---------------------------------------------|-------------------------|----------------------------------------|--------------|--------------------------------------------|-----------------------|
| <b>S#1</b>         | UX               | 213 (98.6%)                      | 1.05         | 0.33                                        | 0.99                    | 1.35                                   | 3.99         | 6.36                                       | 0.99                  |
|                    | UY               | 215 (99.5%)                      | 0.98         | 1.12                                        | 0.97                    | 1.64                                   | 5.25         | 7.42                                       | 0.98                  |
|                    | UZ               | 215 (99.5%)                      | 0.99         | 3.25                                        | 0.99                    | 2.78                                   | 0.70         | 9.20                                       | 0.99                  |
| <b>S#2</b>         | UX               | 205 (96.7%)                      | 1.01         | 0.54                                        | 0.97                    | 2.31                                   | 2.47         | 12.28                                      | 0.98                  |
|                    | UY               | 209 (98.6%)                      | 1.00         | -1.91                                       | 0.99                    | 2.33                                   | 1.26         | 10.05                                      | 0.99                  |
|                    | UZ               | 207 (97.6%)                      | 1.00         | 0.57                                        | 1.00                    | 2.91                                   | 1.11         | 10.49                                      | 1.00                  |
| <b>S#3</b>         | UX               | 130 (99.2%)                      | 0.71         | -8.00                                       | 0.87                    | 3.11                                   | 5.20         | 12.23                                      | 0.87                  |
|                    | UY               | 130 (99.2%)                      | 0.95         | 3.85                                        | 0.96                    | 3.26                                   | 2.72         | 9.92                                       | 0.98                  |
|                    | UZ               | 131 (100%)                       | 1.05         | -22.10                                      | 0.91                    | 11.88                                  | 5.08         | 45.86                                      | 0.90                  |
| <b>S#4</b>         | UX               | 226 (98.7%)                      | 1.05         | -1.06                                       | 0.98                    | 1.25                                   | 3.19         | 4.50                                       | 0.99                  |
|                    | UY               | 226 (98.7%)                      | 1.09         | -1.12                                       | 0.99                    | 0.97                                   | 2.05         | 5.05                                       | 0.98                  |
|                    | UZ               | 225 (98.3%)                      | 0.99         | 4.56                                        | 0.99                    | 1.69                                   | 0.57         | 9.33                                       | 0.99                  |
| <b>Pooled</b>      | UX               | 774 (98.2%)                      | 0.99         | 1.03                                        | 0.99                    | 2.54                                   | 2.72         | 12.28                                      | 1.00                  |
|                    | UY               | 780 (99.0%)                      | 0.98         | 1.47                                        | 1.00                    | 2.18                                   | 1.18         | 10.05                                      | 1.00                  |
|                    | UZ               | 778 (98.7%)                      | 1.04         | -10.75                                      | 0.99                    | 6.89                                   | 1.72         | 45.86                                      | 0.99                  |

<sup>1</sup>Concordance Correlation Coefficient according to Lin (1989).
