# Supplementary material for: Micro Finite Element models of the vertebral body: Validation of local displacement predictions
Source: PubMed Central journal article supplement (PMC5507408; doi:10.1371/journal.pone.0180151), 2017-07-11
Supplement: pone.0180151.s002.pdf [file pone.0180151.s002.pdf]

**S2 Table. Additional linear regression analysis between experimental and predicted local displacements for a tissue modulus  $E_t=12.0\text{GPa}$  performed for the different bone types (i.e. cortical, Cort, and trabecular, Trab, bones). Data are reported for predictions along the three Cartesian directions (X and Y in a transverse plane, Z in the axial direction) for the individual specimens.**

| Specimen ID | Direction | Nr. Comparison points (%) | Bone sites | Nr. Comparison points per bone site | Slope | Intercept [ $\mu\text{m}$ ] | $R^2$ | RMSE % | MaxError [ $\mu\text{m}$ ] |
|-------------|-----------|---------------------------|------------|-------------------------------------|-------|-----------------------------|-------|--------|----------------------------|
| <b>S#1</b>  | UX        | 213 (98.6%)               | Cort       | 28                                  | 1.09  | 0.63                        | 0.99  | 4.27   | 6.36                       |
|             |           |                           | Trab       | 185                                 | 1.05  | 0.31                        | 0.99  | 3.93   | 4.93                       |
|             | UY        | 215 (99.5%)               | Cort       | 28                                  | 0.76  | 6.10                        | 0.91  | 4.86   | 6.98                       |
|             |           |                           | Trab       | 187                                 | 0.98  | 0.94                        | 0.98  | 4.83   | 7.42                       |
|             | UZ        | 215 (99.5%)               | Cort       | 28                                  | 0.98  | 7.96                        | 0.99  | 0.69   | 7.47                       |
|             |           |                           | Trab       | 187                                 | 1.00  | 2.38                        | 0.99  | 0.70   | 9.20                       |
| <b>S#2</b>  | UX        | 205 (96.7%)               | Cort       | 21                                  | 0.99  | 0.99                        | 0.99  | 1.52   | 2.67                       |
|             |           |                           | Trab       | 184                                 | 1.02  | 0.32                        | 0.97  | 2.55   | 12.56                      |
|             | UY        | 209 (98.6%)               | Cort       | 21                                  | 0.98  | 0.57                        | 0.99  | 1.25   | 4.37                       |
|             |           |                           | Trab       | 188                                 | 1.01  | -2.20                       | 0.99  | 1.28   | 9.48                       |
|             | UZ        | 207 (97.6%)               | Cort       | 21                                  | 1.00  | -1.17                       | 1.00  | 0.47   | 4.36                       |
|             |           |                           | Trab       | 186                                 | 1.00  | 0.89                        | 1.00  | 1.15   | 10.79                      |
| <b>S#3</b>  | UX        | 130 (99.2%)               | Cort       | 9                                   | 0.83  | -4.94                       | 0.90  | 3.64   | 7.03                       |
|             |           |                           | Trab       | 121                                 | 0.70  | -8.39                       | 0.86  | 5.18   | 12.23                      |
|             | UY        | 130 (99.2%)               | Cort       | 9                                   | 0.97  | 1.67                        | 0.99  | 1.10   | 2.11                       |
|             |           |                           | Trab       | 121                                 | 0.95  | 3.96                        | 0.96  | 2.81   | 9.92                       |
|             | UZ        | 131 (100%)                | Cort       | 9                                   | 1.02  | -7.89                       | 1.00  | 0.56   | 5.76                       |
|             |           |                           | Trab       | 122                                 | 1.04  | -20.92                      | 0.91  | 5.16   | 45.86                      |
| <b>S#4</b>  | UX        | 226 (98.7%)               | Cort       | 31                                  | 0.99  | 0.12                        | 0.98  | 4.02   | 4.50                       |
|             |           |                           | Trab       | 195                                 | 1.06  | -1.28                       | 0.99  | 3.09   | 3.79                       |
|             | UY        | 226 (98.7%)               | Cort       | 31                                  | 1.06  | -0.09                       | 0.99  | 2.05   | 3.91                       |
|             |           |                           | Trab       | 195                                 | 1.10  | -1.40                       | 0.99  | 2.14   | 5.05                       |
|             | UZ        | 225 (98.3%)               | Cort       | 30                                  | 0.95  | 15.26                       | 0.97  | 0.83   | 7.29                       |
|             |           |                           | Trab       | 195                                 | 0.99  | 2.85                        | 0.99  | 0.51   | 9.33                       |
